# Supplementary material
Source: publisher site journal article supplement (https://www.spandidos-publications.com/3401/downloadSupplementary)

Figure S1. Transfection efficiency of three different IKK $\epsilon$  siRNA sequences. (A) Representative western blot and (B) quantitative results of IKK $\epsilon$  expression in vascular smooth muscle cells (n=4-5 per group). Each experiment was repeated three times. \*P<0.05. IKK $\epsilon$ , inhibitor of nuclear factor- $\kappa$ B kinase subunit  $\epsilon$ ; si, small interfering; ns, not significant.

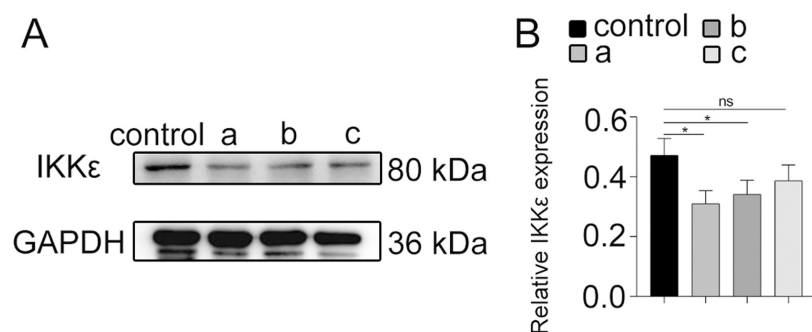

Figure S2. Knockdown of IKK $\epsilon$  does not alter the phosphorylation levels of MEK1/2 and p38. (A) Representative western blots and (B) quantitative results of phosphorylated and total protein levels of MEK1/2 and p38 in vascular smooth muscle cells in the control, SiIKK $\epsilon$ , control + AngII and SiIKK $\epsilon$  + AngII group (n=4-5 per group). Each experiment was repeated three times. IKK $\epsilon$ , inhibitor of nuclear factor- $\kappa$ B kinase subunit  $\epsilon$ ; si, small interfering; AngII, angiotensin II; p, phosphorylated; ns, not significant.

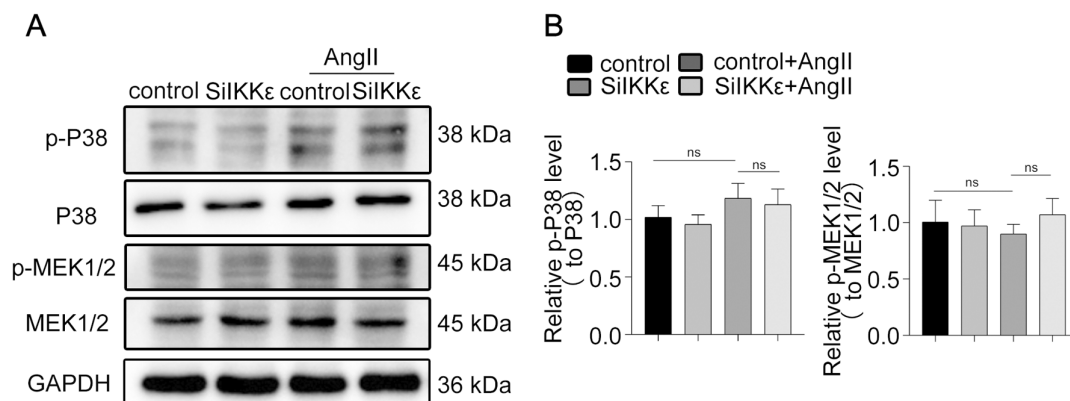

Supplement: Supplementary file 1 [file downloadSupplementary]
